# Supplementary material
Source: publisher figshare collection journal article supplement (https://frontiersin.figshare.com/ndownloader/files/30791947)
Supplement: Supplementary file 1 [file 30791947]

**Appendix A: correlation between Water quality parameters and Phylum-classes abundance**

**Appendix B: correlation between water quality parameters and subclass-orders abundance**

**Appendix C: Correlation between water quality parameters and families abundance**

See on the supplementary data file

**Appendix D: Correlation between water quality parameters and metrics**

**Appendix E: Eigenvalue of factors**
